# Supplementary material for: Complete Chloroplast Genome Sequence of Omani Lime (Citrus aurantiifolia) and Comparative Analysis within the Rosids
Source: PLoS One. 2014 Nov 14;9(11):e113049. doi: 10.1371/journal.pone.0113049 (PMC4232571; doi:10.1371/journal.pone.0113049)
Supplement: Table S1 — List of the complete chloroplast genome sequences included in the phylogenetic analysis. (XLSX) [file pone.0113049.s003.xlsx]

## Sheet: 工作表1
Table S1. Accessions of complete plastome sequences included in the phylogenetic tree and their GC content
Order	Taxa	Accession	Size (bp)	GC %
Brassicales	Aethionema cordifolium	NC_009265	154168	36.6
	Aethionema grandiflorum	NC_009266	154243	36.8
	Arabidopsis thaliana	NC_000932	154478	36.3
	Arabis hirsuta	NC_009268	153689	36.4
	Barbarea verna	NC_009269	154532	36.4
	Brassica napus	NC_016734	152860	36.3
	Capsella bursa-pastoris	NC_009270	154490	36.6
	Carica papaya	NC_010323	160100	36.9
	Crucihimalaya wallichii	NC_009271	155199	36.4
	Draba nemorosa	NC_009272	153289	36.5
	Lepidium virginicum	NC_009273	154743	36.5
	Lobularia maritima	NC_009274	152659	36.5
	Nasturtium officinale	NC_009275	155105	36.4
	Olimarabidopsis pumila	NC_009267	154737	36.5
	Pachycladon cheesemanii	NC_021102	154498	36.4
	Pachycladon enysii	NC_018565	154896	36.4
Cucurbitales	Corynocarpus laevigata	NC_014807	159202	36.6
	Cucumis melo ssp. melo	NC_015983	156017	36.9
	Cucumis sativus	NC_007144	155293	37.1
Fabales	Cicer arietinum	NC_011163	125319	33.9
	Glycine max	NC_007942	152218	35.4
	Glycine tomentella	NC_021636	152728	35.3
	Lathyrus sativus	NC_014063	121020	35.1
	Lotus japonicus	NC_002694	150519	36
	Medicago truncatula	NC_003119	124033	34
	Millettia pinnata	NC_016708	152968	34.8
	Phaseolus vulgaris	NC_009259	150285	35.4
	Pisum sativum	NC_014057	122169	34.8
	Trifolium subterraneum	NC_011828	144763	34.4
	Vigna angularis	NC_021091	151683	35.2
	Vigna radiata	NC_013843	151271	35.2
	Vigna unguiculata	NC_018051	152415	35.2
Fagales	Castanea mollissima	NC_014674	160799	36.8
	Quercus rubra	NC_020152	161304	36.8
Geraniales	Erodium carvifolium	NC_015083	116935	39
	Erodium guttatum	NC_018762	128510	39.4
	Erodium texanum	NC_014569	130812	39.5
	Francoa sonchifolia	NC_021101	157312	37.6
	Geranium palmatum	NC_014573	155794	39.1
	Monsonia speciosa	NC_014582	128787	40.4
	Pelargonium x hortorum	NC_008454	217942	39.6
Malpighiales	Hevea brasiliensis	NC_015308	161191	35.7
	Jatropha curcas	NC_012224	163856	35.4
	Manihot esculenta	NC_010433	161453	35.9
	Populus alba	NC_008235	156505	36.7
	Populus trichocarpa	NC_009143	157033	36.7
	Ricinus communis	NC_016736	163161	35.7
Malvales	Theobroma cacao	NC_014676	160619	36.9
	Gossypium incanum	NC_018109	159205	37.4
	Gossypium tomentosum	NC_016690	160433	37.2
	Gossypium hirsttum	NC_007944	160301	37.2
Myrtales	Allosyncarpia ternata	NC_022413	159593	36.8
	Corymbia eximia	NC_022409	160012	36.8
	Eucalyptus globulus ssp. globulus	NC_008115	160286	36.9
	Eucalyptus deglupta	NC_022399	160177	36.9
	Eucalyptus umbra	NC_022387	159576	36.8
	Oenothera biennis	NC_010361	164807	39.1
	Oenothera elata ssp. hookeri	NC_002693	165728	39.1
	Oenothera parviflora	NC_010362	163365	39.1
	Stockwellia quadrifida	NC_022414	159561	36.9
	Syzygium cumini	GQ870669	160373	36.8
	Angophora costata	NC_022412	160326	36.8
Rosales	Fragaria virginiana	NC_019602	155621	37.2
	Fragaria vesca ssp. bracteata	NC_018766	129788	36.1
	Fragaria vesca ssp. vesca	NC_015206	155691	37.2
	Morus indica	NC_008359	158484	36.4
	Pentactina rupicola	NC_016921	156612	36.8
	Prinsepia utilis	NC_021455	156328	36.9
	Prunus persica	NC_014697	157790	36.8
	Pyrus pyrifolia	NC_015996	159922	36.6
Sapindales	Citrus sinensis	NC_008334	160129	38.5
	Citrus aurantiifolia	this study	159983	38.4
Vitales	Vitis vinifera	NC_007957	160928	37.4
